# Supplementary material for: Stretchable and self-healing electronic skin based on a piezoelectric/triboelectric polyester elastomer for deep and superficial sensation
Source: Royal Society of Chemistry journal article supplement (doi:10.1039/d3ta03868h), 2023-01-01
Supplement: d3ta03868h1.pdf [file d3ta03868h1.pdf]

## Supplementary Information

### Stretchable and Self-healing Electronic Skin Based on Piezoelectric/Triboelectric Polyester Elastomer for Deep and Superficial Sensation

Yanxiu Qiao<sup>a, d</sup>, Qian Zhang<sup>a, d</sup>, Yong Xiang<sup>a, d</sup>, Zhao Wang<sup>b, c</sup>\*, and Xiaoran Hu<sup>a, d</sup>\*

<sup>a</sup> School of Materials and Energy, University of Electronic Science and Technology of China, Chengdu, China

<sup>b</sup> Institute of Emergent Elastomers, School of Materials Science and Engineering, South China University of Technology, Guangzhou 510640, China

<sup>c</sup> State Key Laboratory of Organic-Inorganic Composites, Beijing University of Chemical Technology, Beijing 100029, P. R. China

<sup>d</sup> Chengdu CoreUnion Technology Co., Ltd

\*(Correspondence to Xiaoran Hu, e-mail:Huxiaoran@uestc.edu.cn)

#### Nuclear Magnetic Resonance

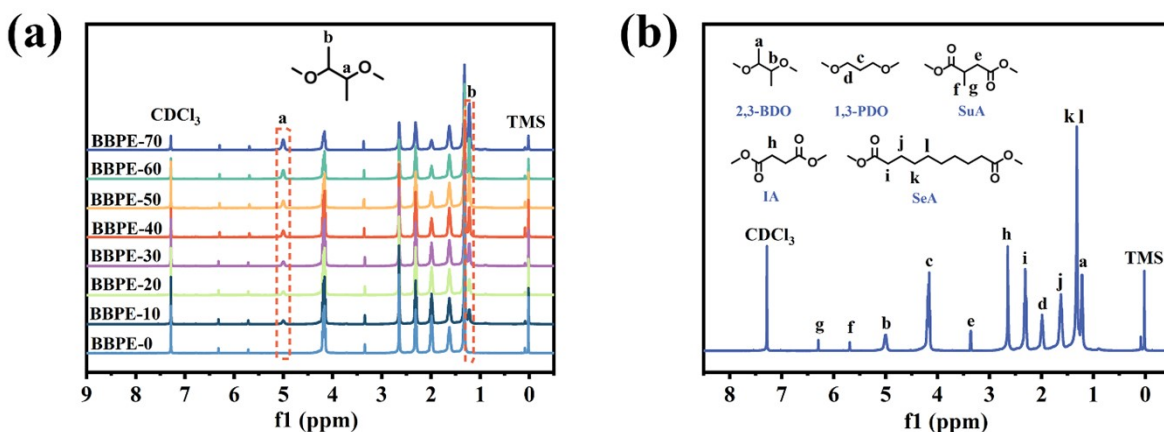

**Figure S1.** (a) <sup>1</sup>H NMR spectra of the BBPE copolyester series; (b) <sup>1</sup>H NMR spectra of the BBPE-50 copolyester

The compositions of BBPE are verified by <sup>1</sup>H NMR. All proton signals of the BBPE's repeating units are detected at their anticipated chemical shift values with corresponding peaks. A representative <sup>1</sup>H-NMR spectrum of BBPE-50 is shown in Fig S1b. The signals of the methylene groups in sebacic acid  $-(\text{CH}_2)_4\text{-CH}_2\text{-CH}_2\text{-COO}-$  are found at  $\delta$ 1.32(k\l), 1.62(j), and 2.32(i) ppm. The peaks at  $\delta$ 2.64(e) ppm originate from the protons of succinic acid  $-\text{COO}-(\text{CH}_2)_2-$ . The peaks at  $\delta$ 6.35(h), 5.73(g) and 3.36(f) ppm are attributed to alkene and methylene group of itaconic acid  $-\text{CO}-\text{C}(\text{=CH}_2)\text{-CH}_2-$ . The presence of 1,3-propanediol  $-(\text{CH}_2)\text{-CH}_2\text{-O}-$  is confirmed by the peaks at  $\delta$ 1.98(d)

and 4.17(c) ppm. The peaks at  $\delta$ 1.22(a) and 5.01(b) ppm are attributed to methyl and methyne group of 2,3-butanediol  $-O-CH(CH_3)-$ . These two peaks demonstrate the successful introduction of 2,3-BDO repeating units into BBPE chains. The relative intensity of the peaks corresponding to the 2,3-BDO segments increases with increasing initial feeding of 2,3-BDO, indicating that the content of 2,3-BDO in these elastomers increases with increasing initial feeding of 2,3-BDO.

### Fourier Transform Infrared Spectroscopy (FTIR)

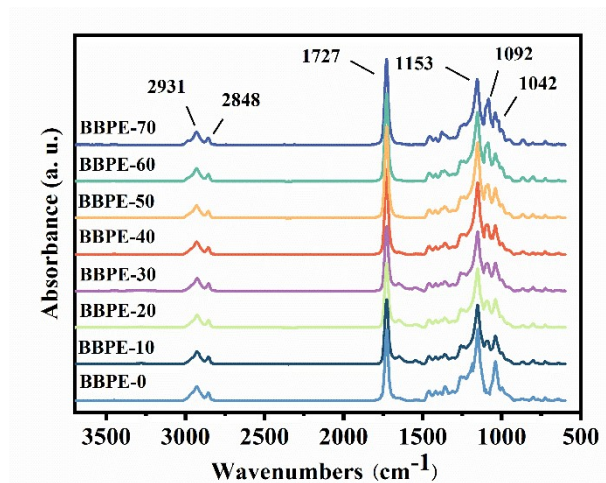

**Figure S2.** FTIR spectra of the BBPE copolyester series

Figure S2 shows the FTIR spectra of BBPE. The signal at  $808\text{ cm}^{-1}$  is attributed to the presence of stretching and bending vibrations of  $-C=C-H$  from the double bonds in itaconate. The intense absorption at  $1727\text{ cm}^{-1}$  is associated with the stretching vibration of the carbonyl group ( $C=O$ ), indicating the formation of abundant ester bonds. The absorption at  $1153\text{ cm}^{-1}$  confirms the presence of the  $C-O-C=O$  groups in ester bonds. The absorptions at  $2931\text{ cm}^{-1}$  and  $2848\text{ cm}^{-1}$  are assigned to the symmetric and the anti-symmetric stretching vibrations of methylene ( $-CH_2$ ), respectively. The characteristic absorption observed at  $1092\text{ cm}^{-1}$  demonstrates the presence of  $C-O$  groups in the primary alcohol of 2,3-BDO, and the relative intensity of this absorption significantly increases with increasing content of 2,3-BDO, which is in accordance with the  $^1H$ NMR results. These results confirm the successful introduction of 2,3-BDO into the macromolecular chains of the BBPE.

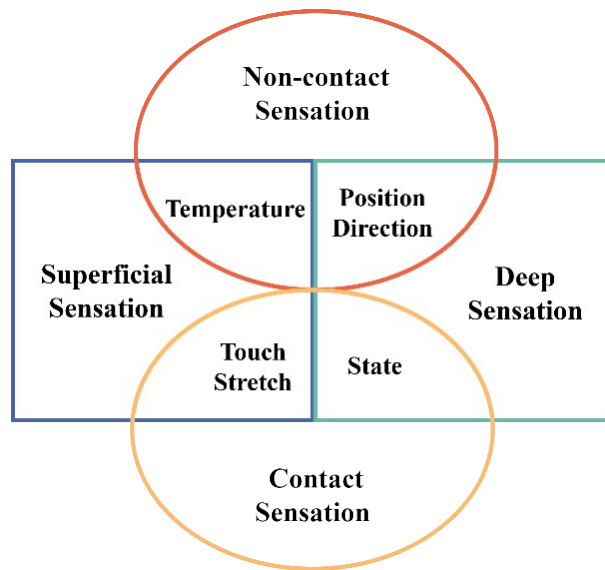

**Figure S3.** The relationship diagram of superficial sensation and deep sensation, as well as non-contact sensation and contact sensation

Deep sensation and superficial sensation are inherently segregated based on their definitions, while contact sensation and non-contact sensation exhibit non-intersecting domains according to whether physical contact occurs. Further subdivision of deep and superficial sensations leads us to broadly deduce the relationship diagram depicted above, albeit representing only a subset of the interconnections. Position and direction sensation within deep sensation, as well as temperature sensation within superficial sensations, are attributed to non-contact sensation. Conversely, state sensation within deep sensation and touch along with stretch within superficial sensation are categorized under the contact sensation. It is noteworthy that the realization of both deep and superficial sensations encompasses intricate varieties and mechanisms, with our research efforts focusing on a partial exploration thereof.

### Mechanical property

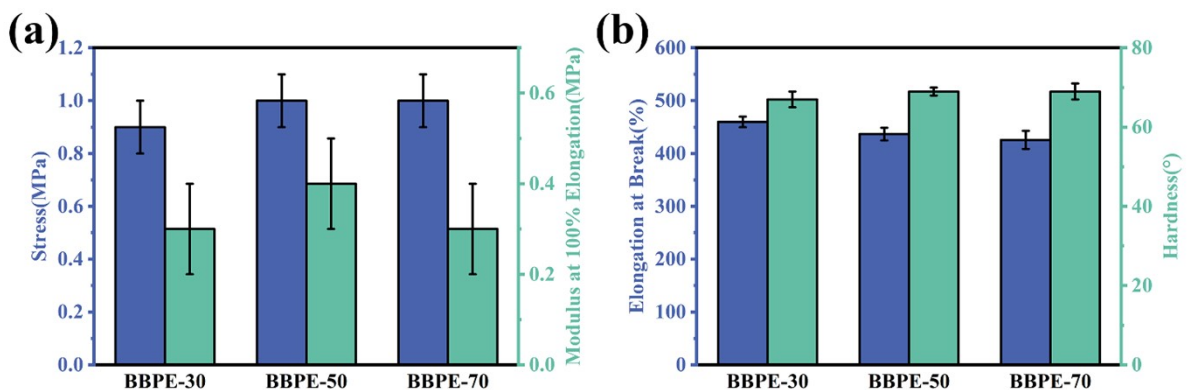

**Figure S4.** Mechanical properties of the BBPE copolyester series.

## Piezoelectric and triboelectric properties

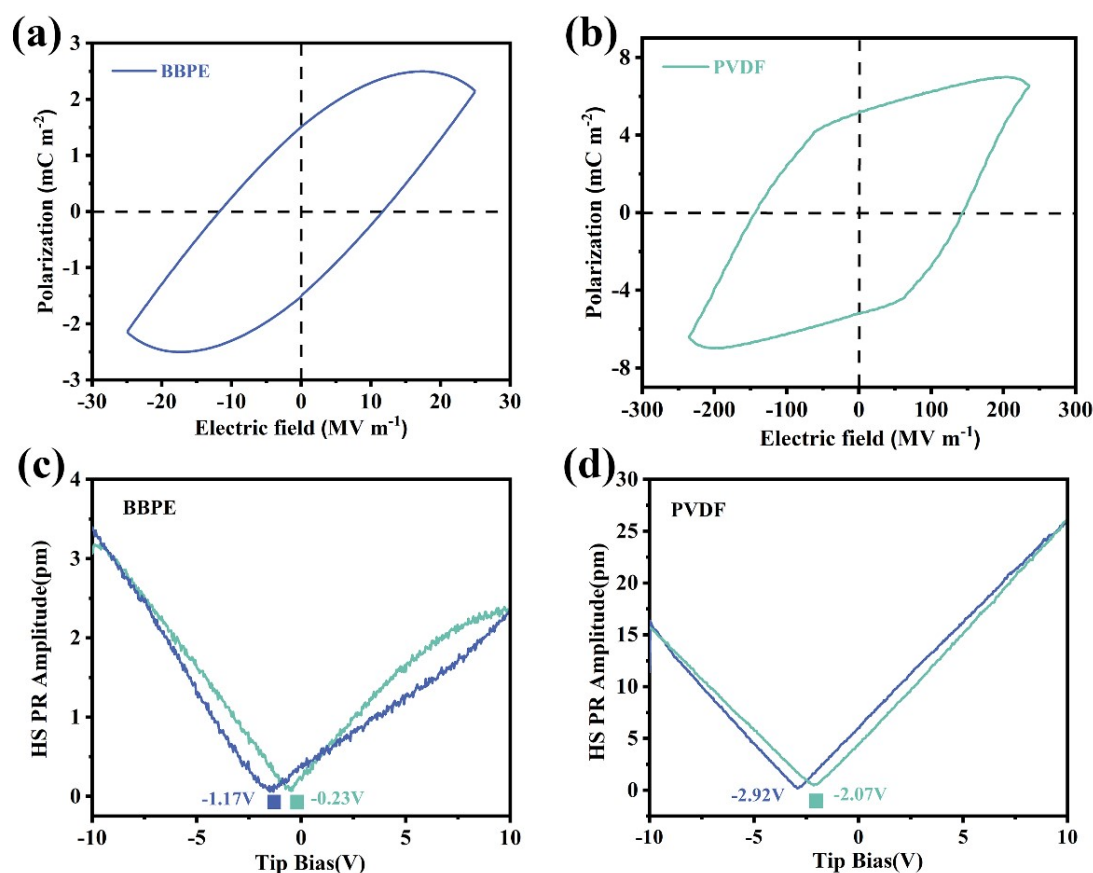

**Figure S5.** The P-E curves of (a) BBPE and (b) PVDF; The amplitude curve (butterfly curve) of (c) BBPE and (d) PVDF.

The P-E curves are obtained at 2 kV with BBPE thickness of 80  $\mu\text{m}$  and the purchased PVDF thickness of 8.5  $\mu\text{m}$ , respectively. As presented in Figure S1(a) and (b), the BBPE shows elliptical P-E curves due to possible large leakage current. The Pr value of 1.6  $\text{mC}/\text{m}^2$  is obtained with coercive electric field of 13  $\text{MV}/\text{m}$ . The PVDF shows obvious higher coercive electric field of 240  $\text{MV}/\text{m}$  and larger Pr value of 7.3  $\text{mC}/\text{m}^2$  compared with those of BBPE.

Furthermore, the clearly hysteresis can be observed in amplitude curve of BBPE from PFM methods, the strain mutation voltages are  $-1.17\text{ V}$  and  $-0.23\text{ V}$ , respectively (Figure S1(c)), while, the strain mutation voltages of PVDF are  $-2.92\text{ V}$  and  $-2.07\text{ V}$  (Figure S1(d)). Since the center of the amplitude curve does not coincide with 0 V, it indicates that the internal electric field can be formed in BBPE and PVDF, which is a solid description of its piezoelectric characteristics.

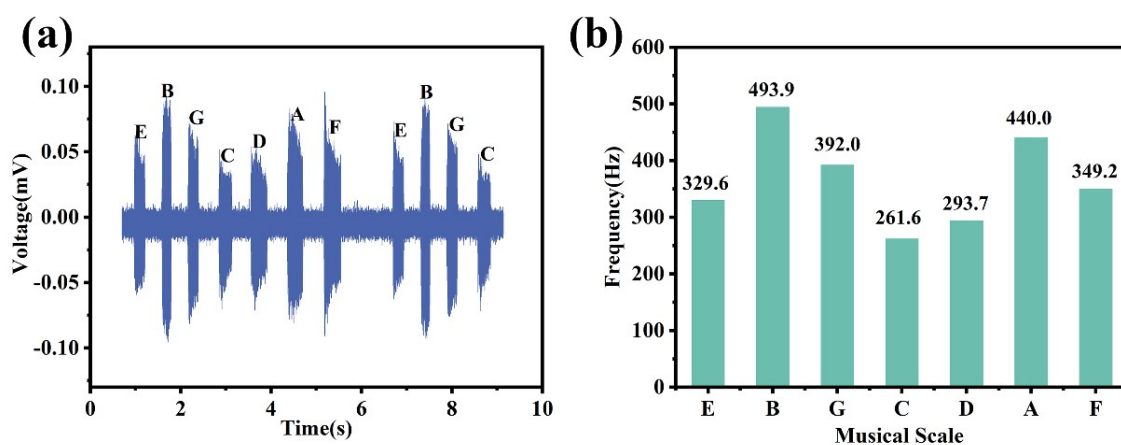

**Figure S6.** (a) Piezoelectric voltage behaviors of PBES under different musical scales.(b) The frequency diagram corresponding to different musical scales.

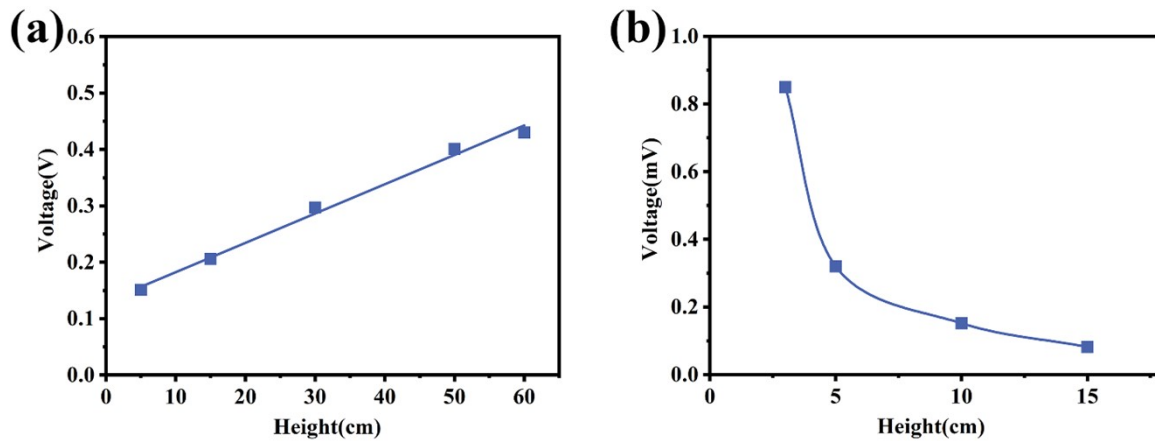

**Figure S7.** (a)Piezoelectric responses of PBES to different height of free-fall dropping; (b)Triboelectric responses of PBES to different height of PE film moving above.

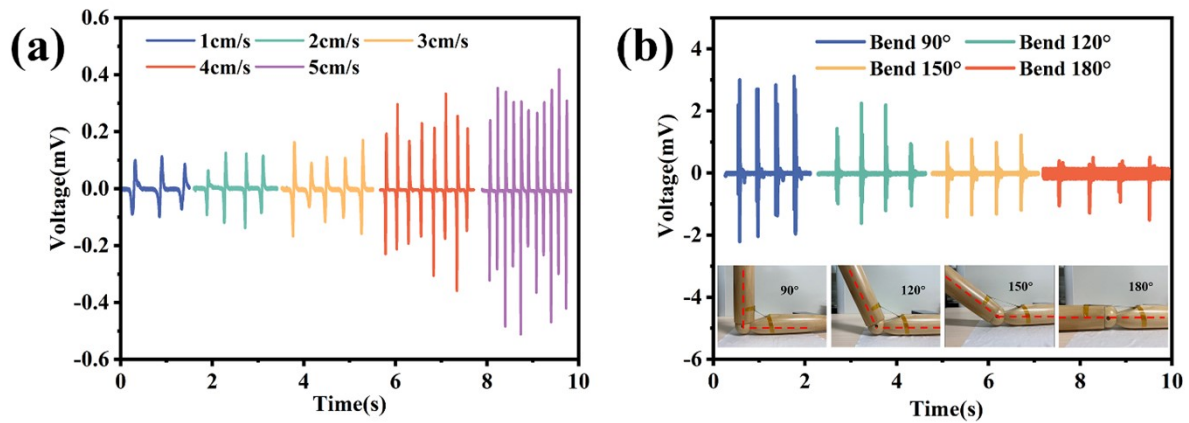

**Figure S8.** (a) Triboelectric open-circuit voltage behaviors of PBES to different speed of PE film moving above. (b) Piezoelectric open-circuit voltage behaviors of PBES to arm module bending at different angles.

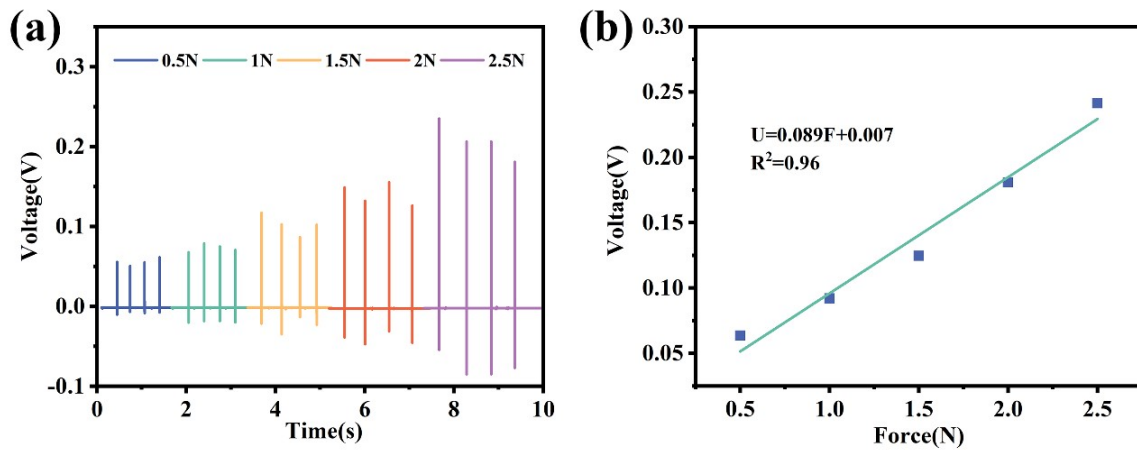

**Figure S9.** (a) Piezoelectric voltage behaviors of PBES under different force; (b) Linear fitting relationship between piezoelectric voltage and input force.

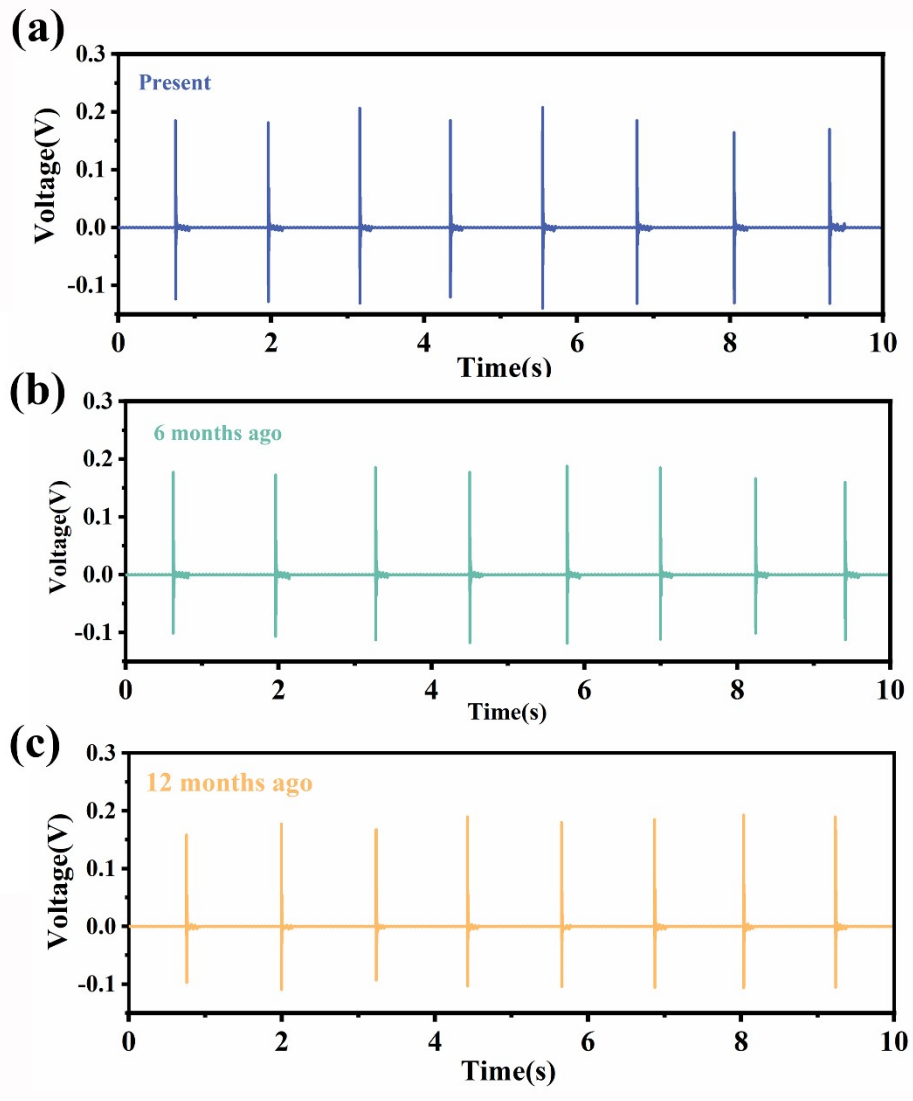

Figure S10. Piezoelectric voltage behaviors of PBES at different time.

Table S1. Piezoelectric responses of PBES at different time.

| Preparation time | Voltage (mV) | Voltage retention rate(%) |
|------------------|--------------|---------------------------|
| Present          | 0.313±0.017  | 100.00                    |
| 6 months ago     | 0.287±0.014  | 91.55                     |
| 12 months ago    | 0.281±0.014  | 89.55                     |

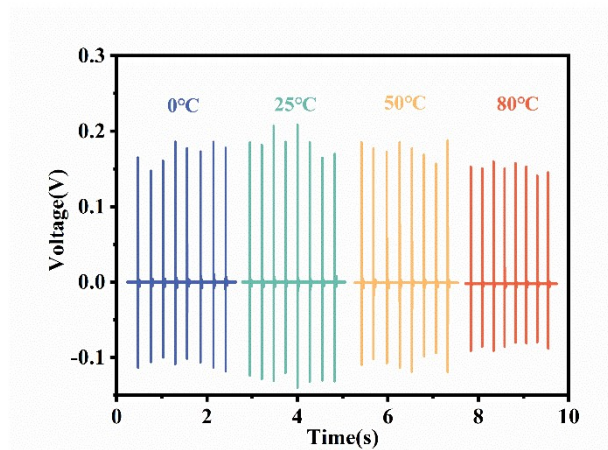

**Figure S11.** Piezoelectric voltage behaviors of PBES at different temperatures.

**Table S2.** Piezoelectric responses of PBES at different temperatures.

| Temperature(°C) | Voltage (mV) | Voltage retention rate(%) |
|-----------------|--------------|---------------------------|
| 0               | 0.284±0.016  | 90.73                     |
| 25              | 0.313±0.014  | 100.00                    |
| 50              | 0.287±0.018  | 91.69                     |
| 80              | 0.249±0.009  | 79.55                     |



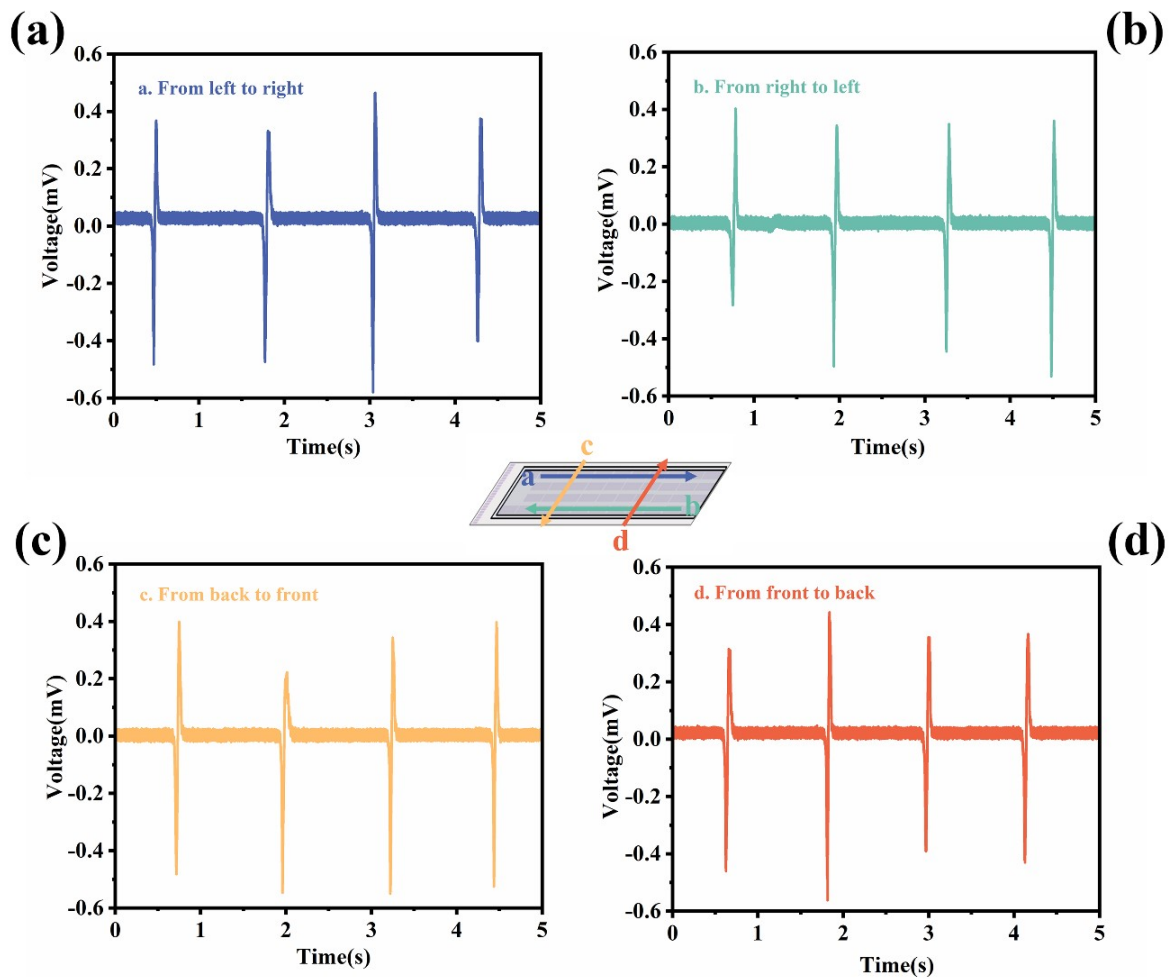

**Figure S12.** Triboelectric voltage behaviors of PE film in different motion directions above the PBES device.

## Biocompatibility

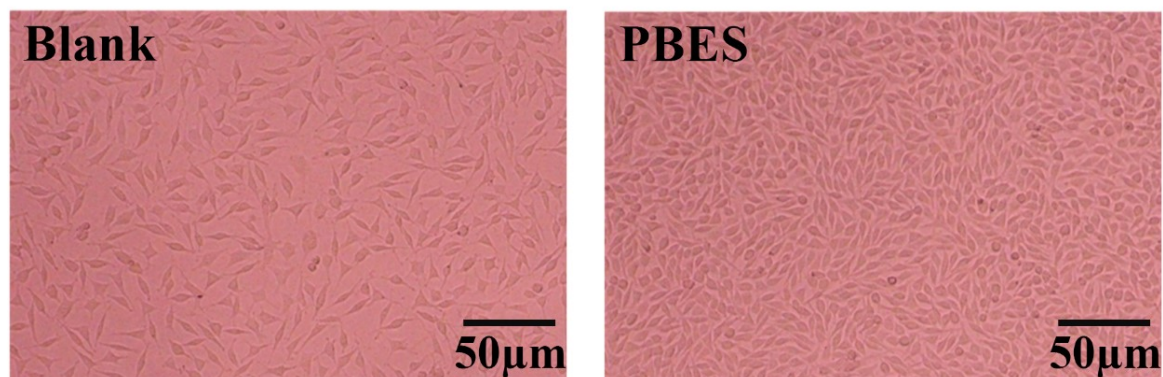

**Figure S13.** Optical image of L929 cells incubated for 3 days on the control sample and BBPE.

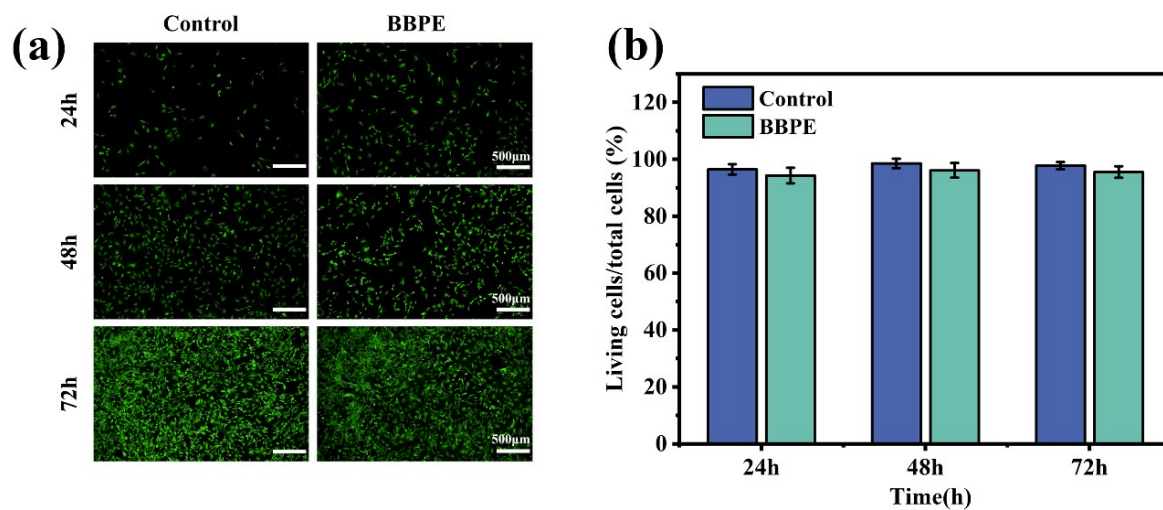

**Figure S14.** (a) Dead and live assay evaluation of tenocytes (green, live; red, dead) proliferation in normal medium and BBPE at 24, 48 and 72 hours. (b) The percentage of living cells in normal medium and BBPE.

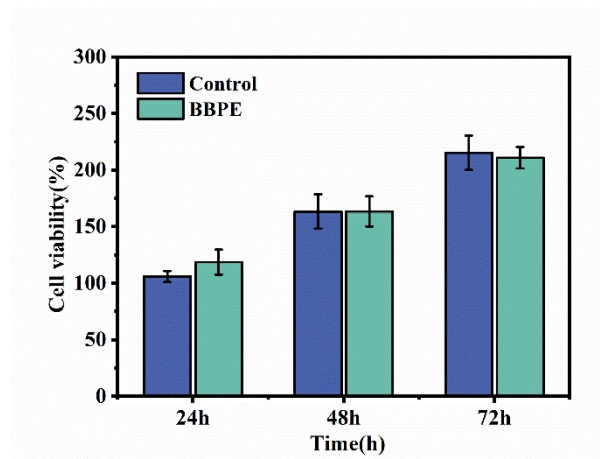

**Figure S15.** The cell viability of tenocytes cultured in normal medium and BBPE detected by CCK-8 assay.

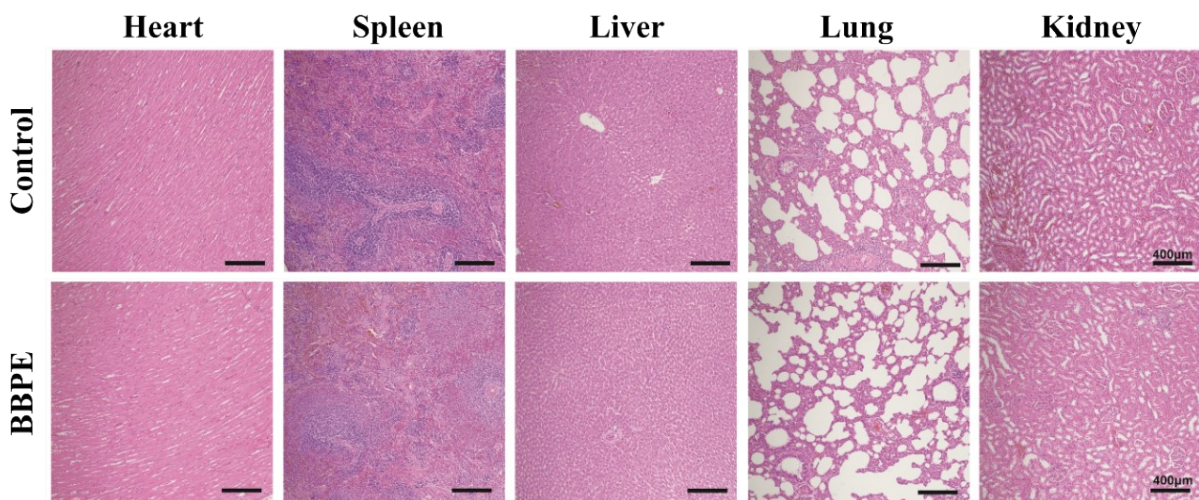

**Figure S16.** Biological toxicity validation of BBPE in vivo after 2 weeks treatment.

## Self-healing properties

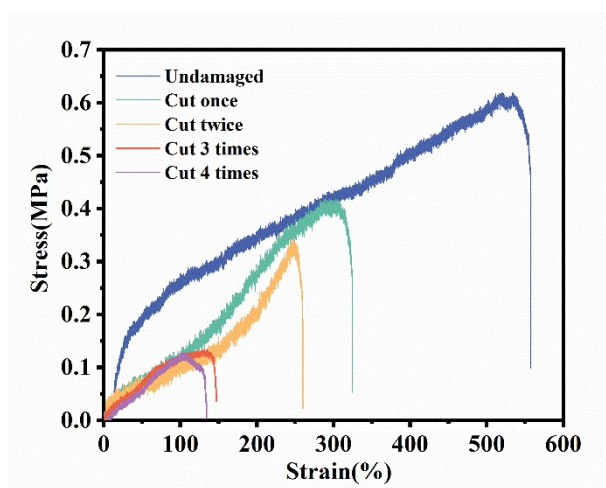

**Figure S17.** The mechanical properties of PBES generated after various cut-heal cycles.

**Table S3.** The mechanical properties of PBES after different cut-heal cycles.

| Cut-heal cycles | Maximum Stress (MPa) | Elongation at Break (%) |
|-----------------|----------------------|-------------------------|
| 0               | 0.6122±0.0012        | 557.54±3.24             |
| 1               | 0.4178±0.0023        | 324.78±2.56             |
| 2               | 0.3418±0.0015        | 259.69±4.11             |
| 3               | 0.1307±0.0029        | 147.01±2.81             |
| 4               | 0.1254±0.0008        | 132.48±3.29             |

**Table S4.** The abbreviations of proper nouns in the manuscript.

| Abbreviation      | Full Name                                |
|-------------------|------------------------------------------|
| BBPE              | Butanediol-based piezoelectric elastomer |
| PBES              | Polyester-based electronic skin          |
| BDO               | Butanediol                               |
| PDO               | Propanediol                              |
| SuA               | Succinic Acid                            |
| SeA               | Sebacic acid                             |
| IA                | Itaconic Acid                            |
| DCP               | Dicumyl peroxide                         |
| TBT               | Tetrabutyl titanate                      |
| PE                | Polyethylene                             |
| <sup>1</sup> HNMR | Proton nuclear magnetic resonance        |
| FTIR              | Fourier transform infrared spectroscopy  |
| DSC               | Differential scanning calorimetry        |
| XRD               | X-ray diffraction                        |
| RGR               | Relative growth rate                     |

**Table S5.** Piezoelectric responses of PBES stretched to different length.

| Length (cm) | Elongation (%) | Voltage (mV) |
|-------------|----------------|--------------|
| 5           | 150            | 4.627        |
| 10          | 400            | 4.232        |
| 15          | 650            | 1.313        |
| 20          | 900            | 1.012        |

**Table S6.** Piezoelectric responses of PBES after different stretch-recovery cycles.

| Stretch-recovery cycles. | Voltage (mV) | Voltage retention rate(%) |
|--------------------------|--------------|---------------------------|
| 0                        | 5.037        | 0                         |
| 30                       | 4.742        | 94.14                     |
| 60                       | 4.587        | 91.07                     |
| 100                      | 3.806        | 75.56                     |

**Table S7.** Triboelectric responses of PBES to different area of PE film moving.

| Area (cm <sup>2</sup> ) | Voltage (mV) |
|-------------------------|--------------|
| 20×20                   | 0.955        |
| 30×30                   | 1.277        |
| 40×40                   | 1.838        |
| 50×50                   | 5.087        |

**Table S8.** Piezoelectric responses of PBES to finger bending at different angles.

| Angle (°) | Voltage (mV) |
|-----------|--------------|
| 180       | 0.097        |
| 150       | 0.278        |
| 120       | 0.362        |
| 90        | 0.521        |

**Table S9.** Piezoelectric responses of PBES after different cut-heal cycles.

| Cut-heal cycles | Voltage (mV) | Voltage retention rate(%) |
|-----------------|--------------|---------------------------|
| 0               | 50.40        | 0                         |
| 1               | 45.91        | 91.09                     |
| 2               | 44.90        | 89.09                     |
| 3               | 44.05        | 87.40                     |
| 4               | 38.98        | 77.34                     |
